1 **A SCID mouse model to evaluate the efficacy of antivirals against SARS-CoV-2 infection**

2 Rana Abdelnabi<sup>1</sup>, Caroline S. Foo<sup>1</sup>, Suzanne J. F. Kaptein<sup>1</sup>, Robbert Boudewijns<sup>1</sup>, Laura Vangeel<sup>1</sup>, Steven

3 De Jonghe<sup>1</sup>, Dirk Jochamns<sup>1,2</sup>, Birgit Weynand<sup>3</sup>, Johan Neyts<sup>1,2\*</sup>

4 1. KU Leuven Department of Microbiology, Immunology and Transplantation, Rega Institute for  
5 Medical Research, Laboratory of Virology and Chemotherapy, B-3000 Leuven, Belgium.

6 2. Global Virus Network, GVN.

7 3. KU Leuven Department of Imaging and Pathology, Translational Cell and Tissue Research, B-3000  
8 Leuven, Belgium; Division of Translational Cell and Tissue Research.

9

10

11

12 \*To whom correspondence may be addressed. Email: [johan.neyts@kuleuven.be](mailto:johan.neyts@kuleuven.be).

13

14 **Abstract**

15 Ancestral SARS-CoV-2 lacks the intrinsic ability to bind to the mouse ACE2 receptor and therefore  
16 establishment of SARS-CoV-2 mouse models has been limited to the use of mouse-adapted viruses or  
17 genetically modified mice. Interestingly, some of the variants of concern, such as the beta B.1.351  
18 variant, show an improved binding to the mouse receptor and hence better replication in different  
19 Wild type (WT) mice species. Here, we describe the establishment of SARS-CoV-2 beta B.1.351 variant  
20 infection model in male SCID mice as a tool to assess the antiviral efficacy of potential SARS-CoV-2  
21 small molecule inhibitors. Intranasal infection of male SCID mice with  $10^5$  TCID<sub>50</sub> of the beta B.1.351  
22 variant resulted in high viral loads in the lungs and moderate signs of lung pathology on day 3 post-  
23 infection (pi). Treatment of infected mice with the antiviral drugs Molnupiravir (200 mg/kg, BID) or  
24 Nirmatrelvir (300 mg/kg, BID) for 3 consecutive days significantly reduced the infectious virus titers in  
25 the lungs by 1.9 and 3.8 log<sub>10</sub> TCID<sub>50</sub>/mg tissue, respectively and significantly improved lung pathology.  
26 Together, these data demonstrate the validity of this SCID mice/beta B.1.351 variant infection model  
27 as a convenient preclinical model for assessment of potential activity of antivirals against SARS-CoV-2.

28

29

30

31 **Key words**

32 SARS-CoV-2; mouse model; beta variant; antivirals; Nirmatrelvir

33

34 **Importance**

35 Unlike the ancestral SARS-CoV-2 strain, the beta (B.1.351) VoC has been reported to replicate to  
36 some extent in WT mice (species C57BL/6 and BALB/c). We here demonstrate that infection of  
37 SCID mice with SARS-CoV-2 beta variant results in high viral loads in the lungs on day 3 post-  
38 infection (pi). Treatment of infected mice with the antiviral drugs Molnupiravir or Nirmatrelvir  
39 for 3 consecutive days markedly reduced the infectious virus titers in the lungs and improved lung  
40 pathology. The advantages of using this mouse model over the standard hamster infection models  
41 to assess the *in vivo* efficacy of small molecule antiviral drugs are (i) the use of a clinical isolate  
42 without the need to use mouse-adapted strains or genetically modified animals (ii) lower amount  
43 of the test drug is needed and (ii) more convenient housing conditions compared to bigger rodents  
44 such as hamsters.

45

## 46 **Introduction**

47 Since its emergence in China end of 2019, the severe acute respiratory syndrome coronavirus (SARS-  
48 CoV-2) has resulted in a global pandemic with officially >517 million cases (as of May 10, 2022) and  
49 around 15 million deaths as estimated by WHO (1). Several SARS-CoV-2 variants of concern (VoC), that  
50 result in immune escape and/or enhanced viral transmission have since then emerged (2, 3). Small  
51 animal models are necessary to study the virus-induced pathogenesis as well as to serve as preclinical  
52 tool to assess the efficacy of vaccine and therapeutics against the viral infection. Similar to SARS-CoV,  
53 SARS-CoV-2 enters the host cells through attachment to the cellular angiotensin-converting enzyme 2  
54 (ACE2) (4). Since SARS-CoV-2 binds efficiently to the hamster ACE2 (5), Syrian hamsters are considered  
55 so far one of the best small animal models available for SARS-CoV-2. On the other hand, the spike of  
56 the ancestral SARS-CoV-2 lacks the intrinsic ability to efficiently bind to the murine ACE2 (5) and hence  
57 this strain has a limited replication in WT mice. Consequently, alternative strategies have been  
58 developed to allow the establishment of mouse models for SARS-CoV-2. One of these strategies is  
59 adaptation of the virus in murine lung tissues to enhance the binding capacity to the murine ACE2 (6,  
60 7). Other strategies focused on introduction of human ACE2 in wild-type mice either by transduction  
61 adenovirus or adeno-associated virus that expresses human ACE2 (8) or using genetically modified  
62 human ACE2 transgenic (9) or humanized mice (10). Unlike the ancestral strain, some of the evolved  
63 SARS-CoV-2 VoCs proved to carry spike protein mutations, mainly the N501Y, that enable efficient  
64 binding to the murine ACE2 and hence better replication in WT mice (11, 12). Besides the N501Y  
65 mutation, the spike of the beta B.1.135 variant carries the K417N mutation that was previously  
66 reported in a virulent mouse-adapted SARS-CoV-2 variant (13). Several studies have shown the ability  
67 of the beta variant to replicate to some extent in WT mice species such as C57BL/6 (11, 12) and BALB/c  
68 (14, 15). Here, we wanted to explore whether the beta SARS-CoV-2 variant replicates more efficiently  
69 in severe combined immune deficient (SCID) mice than in the reported wild type mice and whether in  
70 such case, SCID mice can be used to develop a sufficiently robust infection model to study the efficacy  
71 of small molecules inhibitors of SARS-CoV-2 infection.

## 73 Results

74 First, a small pilot study was performed to assess the efficiency of replication of the beta (B.1.351)  
75 SARS-CoV-2 variant in male SCID mice in comparison to replication in immunocompetent male BALB/c  
76 and C57BL/6 mice. All mice (n=9 per species), were infected with  $10^5$  TCID<sub>50</sub> of the beta variant. At day  
77 3 post-infection (pi), all animals were euthanized and lungs were collected to quantify the infectious  
78 virus titers. As expected, the infectious virus titer in the lungs of infected SCID mice (median TCID<sub>50</sub>/mg  
79 lung of  $3.28 \times 10^4$ ) was significantly higher than that observed in the lungs of infected BALB/c mice  
80 (median TCID<sub>50</sub>/mg lung of  $3.26 \times 10^3$ , p=0.047) and C57BL/6 mice (median TCID<sub>50</sub>/mg lung of  $2.05 \times 10^3$ ,  
81 p=0.0054), **supplementary Figure S1**.

82 Next, we explored the kinetics of replication of the beta variant in SCID mice. To that end, 7-9 weeks  
83 old male SCID mice were infected intranasally with with  $10^5$  TCID<sub>50</sub> of the beta variant. At days 3  
84 through 7 post-infection (pi), 10 animals were euthanized and lungs were collected to quantify the  
85 infectious virus titers. The highest infectious virus titers were observed at day 3 pi (**Fig. 1A**). From day  
86 4 pi onwards, the infectious virus titers in the lungs were significantly lower than those observed at  
87 day 3 pi (**Fig. 1A**). A minor weight loss was observed on day 3 pi (average %body weight change of -  
88 0.8) after which animals started to gain weight normally (average %body weight change of 4 on day 4  
89 pi) (**Fig. 1B**). When a group of 5 infected mice were monitored up to 14 days pi, no weight loss or any  
90 signs of morbidity were observed in this group (average %body weight change of 13 on day 14 pi).  
91 Histological examination of the lungs from infected mice at day 3 pi revealed mild signs of peri-  
92 bronchial inflammation, significant peri-vascular inflammation and intra-alveolar hemorrhage (**Fig. 1C**)  
93 with median cumulative pathology score of (4.5).

94 In case the infectious virus detected at day 3 post infection represents actively replicating virus, it  
95 should be possible to suppress replication by treating the animals with antiviral drugs. We therefore  
96 assessed the potential antiviral efficacy of two clinically relevant SARS-CoV-2 inhibitors i.e.  
97 Molnupiravir (EIDD-2801) and Nirmatrelvir (PF-332) against beta variant replication in SCID mice.

98 Briefly, male SCID mice were treated twice daily by oral gavage with either vehicle, Molnupiravir (200  
99 mg/kg) or Nirmatrelvir (300 mg/kg) for three consecutive days starting from the day of infection with  
100 the beta variant (**Fig. 2A**). Mice were euthanized at day three pi for collection of lung tissues. A  
101 significant reduction of viral RNA loads was observed in the Molnupiravir (0.8 log<sub>10</sub> genome copies/mg  
102 tissue, p=0.0025) and Nirmatrelvir (2.8 log<sub>10</sub> genome copies/mg tissue, p<0.0001)-treated groups as  
103 compared to the vehicle control (**Fig. 2B**). Moreover, treatment of mice with Molnupiravir and  
104 Nirmatrelvir significantly reduced the infectious virus titers in the lungs by 1.9 (p<0.0001) and 3.8  
105 (p<0.0001) log<sub>10</sub> TCID<sub>50</sub>/mg tissue, respectively compared to the vehicle-treated group (**Fig. 2C**). No  
106 infectious virus titers were detected in four (out of 14) and eight (out of 14) animals in the Molnupiravir  
107 and Nirmatrelvir-treated groups, respectively (**Fig. 2C**). A significant improvement of lung  
108 histopathology scores was also observed in both the Molnupiravir (p=0.025) and Nirmatrelvir  
109 (p=0.0007)-treated groups (**Fig. 2D**). No significant weight loss or clinical signs of adverse effects were  
110 observed in the compounds-treated groups (**Fig. 2E**).

## 111 **Discussion**

112 The emergence of SARS-CoV-2 VoCs has raised a lot of concerns as these variants displayed the ability  
113 to escape vaccine-induced or naturally acquired immunity and to transmit faster than the ancestral  
114 strains. Besides, some of these variants have acquired certain mutations in the spike protein that  
115 allowed them to expand their host species (2, 12). The beta variant (B.1.351 or 501Y.V2) has been first  
116 reported in South Africa in October 2020 (16). The beta variant has acquired three mutations in the  
117 receptor binding domain (RBD) namely N501Y, K417N and E484K, in addition to other mutations in the  
118 spike and non-structural proteins (2). Among these mutations, the N501Y mutation (also presents in  
119 alpha variant) has been previously described in mouse-adapted viruses and proven to play an  
120 important role in increasing the affinity to the mouse ACE2 receptor (6). The K417N mutation has also  
121 previously been reported in a virulent mouse-adapted SARS-CoV-2 variant (13). In a pseudotype-based  
122 entry assay, the pseudoviruses carrying the beta variant spike attached more efficiently to the mouse  
123 ACE2 receptor than the alpha variants, suggesting that the K417N and E484K mutations in the RBD of  
124 beta variant may further enhance the binding to the mouse receptor (11). Recently, a comparative  
125 infection study in BALB/c mice revealed that the beta variant replicates more efficiently than the alpha  
126 and delta variant (15).

127 We here wanted to assess the infectivity of the beta SARS-CoV-2 variant in an immunodeficient mouse  
128 model i.e. SCID mice, with the aim to develop a robust SARS-CoV-2 mouse infection model for  
129 preclinical evaluation of potential antivirals. So far, the hamster SARS-CoV-2 infection model has been  
130 regarded as the best model to study the effect of antiviral agents, yet use of mice would facilitate such  
131 studies. We selected SCID mice as these animals are severely deficient in functional B and T  
132 lymphocytes and therefore they are believed to be more susceptible to viral infections than  
133 immunocompetent mice. Indeed, in our pilot infection study, the infectious virus titers of the beta  
134 variant in the lungs of infected SCID mice on d3 pi were significantly higher than that observed in the  
135 lungs of the immunocompetent BALB/c (1 log<sub>10</sub> higher) and C57BL/6 (1.2 log<sub>10</sub> higher) mice that were

136 infected in parallel. Viral persistence in the lungs of SCID mice was observed in most of the infected  
137 animals up to 7 days pi. However, the infectious virus titers dropped significantly beyond day 3 pi.  
138 Therefore, day 3pi was selected as the endpoint for antiviral testing.

139 Nirmatrelvir (PF-332, Pfizer), is a potent inhibitor of the main protease Mpro (or 3CL protease) of SARS-  
140 CoV-2 and other coronaviruses (17). Paxlovid (Nirmatrelvir and Ritonavir tablets, co-packaged for oral  
141 use) have been authorized by FDA and EMA as well as by other regions. Molnupiravir (Lagevrio™, EIDD-  
142 2801, Merck) is the orally bioavailable prodrug of the ribonucleoside analogue N4-hydroxycytidine  
143 (NHC, EIDD-1931), which was initially developed for influenza (18) and has now also been approved by  
144 several countries/regions for the treatment of COVID-19.

145 We have previously shown that Molnupiravir (EIDD-2801) and Nirmatrelvir (PF-332) significantly inhibit  
146 the replication of the beta variant in Syrian hamsters (19, 20). Therefore, we used these two antiviral  
147 drugs to validate whether the SCID mice/beta variant infection model for antiviral studies. Treatment  
148 of beta variant-infected SCID mice for 3 consecutive days with Molnupiravir (200 mg/kg, BID) or  
149 Nirmatrelvir (300 mg/kg, BID) significantly reduced viral loads in the lung of infected mice with a  
150 potency close to that observed against the same variant in our Syrian hamster model (where the  
151 endpoint is at 4 days post infection) (19, 20). An improvement in lung pathology scores was also  
152 observed in the Molnupiravir- and Nirmatrelvir-treated SCID mice as compared to the vehicle-treated  
153 mice. Thus the SCID mice/beta variant infection model may serve as a useful tool to assess the *in vivo*  
154 efficacy of antiviral molecules against SARS-CoV-2.

155 It is surprising that infected SCID mice seem to control the infection by day 4 post infection. Moreover,  
156 monitoring a group of infected mice up to 14 days pi did not reveal any morbidity signs or weight loss  
157 over time. Typically infection of SCID mice with viruses (that are able to replicate in mice) results in a  
158 lethal infection (21–23).

159 The advantages of using this mouse model for initial *in vivo* evaluation of antivirals include; (i) the use  
160 of a real clinical isolate without the need to use mouse-adapted strains or genetically modified animals



161 (ii) roughly 6-fold less of the test drug needed for the *in vivo* efficacy studies (average weight of a  
162 hamster is 120 gram versus 20 gram for mice), which will save a lot of material which is in particular  
163 important in case of highly priced or not easy to synthesize compounds, (ii) more convenient housing  
164 conditions since up to 5 mice can be co-housed in one cage versus 2 hamsters per cage, which is  
165 important for the capacity of the high biosafety animal facility. Consequently, such a model will enable  
166 testing more compounds in shorter period of time. On the other hand, the limitation of this model, is  
167 that unlike for hamsters, mice are only susceptible to the beta variant. Since small molecule inhibitors  
168 should have equipotent activity against all variants this is not of concern for studies with such drugs.  
169 However, for testing of therapeutic antibodies, infection models (in hamsters) with the different VoC  
170 will still be needed. Likewise, for vaccine studies, fully immunocompetent animals are needed, hence  
171 SCID mice are not useful for this purpose. Therefore, this SCID mice/beta variant infection model will  
172 be mainly advantageous for the evaluation of small molecule inhibitors of SARS-CoV-2 replication.

## 173 **Material and Methods**

### 174 **Virus**

175 The SARS-CoV-2 strain used in this study, the beta variant B.1.351 (hCoV-19/Belgium/regal-1920/2021;  
176 EPI\_ISL\_896474, 2021-01-11), was recovered from a nasopharyngeal swab taken from a patient with  
177 respiratory symptoms returning to Belgium in January 2021 (24). A passage two virus on Vero E6 cells  
178 was used for the study described here. Live virus-related work was conducted in the high-containment  
179 A3 and BSL3+ facilities of the KU Leuven Rega Institute (3CAPS) under licenses AMV 30112018 SBB 219  
180 2018 0892 and AMV 23102017 SBB 219 20170589 according to institutional guidelines.

### 181 **Cells**

182 Vero E6 cells (African green monkey kidney, ATCC CRL-1586) were cultured in minimal essential  
183 medium (Gibco) supplemented with 10% fetal bovine serum (Integro), 1% L- glutamine (Gibco) and  
184 1% bicarbonate (Gibco). End-point titrations were performed with medium containing 2% fetal  
185 bovine serum instead of 10%.

186 **SARS-CoV-2 infection of SCID mice**

187 In brief, 7-9 weeks old male severe combined immune deficient (SCID) mice were purchased from  
188 Janvier Laboratories. Mice were housed in individually ventilated cages with a maximum of five mice  
189 per cage. For infection, mice were anesthetized with isoflurane and inoculated intranasally with 40  $\mu$ L  
190 containing  $10^5$  TCID<sub>50</sub> SARS-CoV-2 beta variant (day 0). At different time-points post-infection (pi), 10  
191 animals were euthanized by intraperitoneal (IP) injection of 100  $\mu$ L Dolethal (200 mg/mL sodium  
192 pentobarbital, Vétoquinol SA) for collection of lung tissues.

193 **Treatment Regimen**

194 Male SCID mice were treated by oral gavage with either the vehicle (n=20) or Molnupiravir (EIDD-  
195 2801, n=14) at 200 mg/kg or Nirmatrelvir (PF-332, n=14) at 300 mg/kg, twice daily starting from D0,  
196 just before the infection with the Beta variant as described in the previous section. All treatments  
197 were continued for 3 consecutive days (thus until day 2 pi). Mice were monitored for appearance,  
198 behavior and weight. At day 3 pi, mice were euthanized. Lungs were collected and viral RNA and  
199 infectious virus were quantified by RT-qPCR and end-point virus titration, respectively. The left lungs  
200 were fixed in 4% formaldehyde for histopathological analysis.

201 **SARS-CoV-2 RT-qPCR**

202 Lung tissues were collected after sacrifice and were homogenized using bead disruption (Precellys)  
203 in TRK lysis buffer (E.Z.N.A.® Total RNA Kit, Omega Bio-tek) and centrifuged (10.000 rpm, 5 min) to  
204 pellet the cell debris. RNA was extracted according to the manufacturer's instructions. RT-qPCR was  
205 performed on a LightCycler96 platform (Roche) using the iTaq Universal Probes One-Step RT-  
206 qPCR kit (BioRad) with N2 primers and probes targeting the nucleocapsid (25). Standards of SARS-CoV-  
207 2 cDNA (IDT) were used to express viral genome copies per mg tissue.

208 **End-point virus titrations**

209 Lung tissues were homogenized using bead disruption (Precellys) in minimal essential medium and  
210 centrifuged (10,000 rpm, 5min, 4°C) to pellet the cell debris. To quantify infectious SARS-CoV-2

211 particles, endpoint titrations were performed on confluent Vero E6 cells in 96-well plates. Viral  
212 titers were calculated by the Reed and Muench method (26) using the Lindenbach calculator  
213 and were expressed as 50% tissue culture infectious dose (TCID<sub>50</sub>) per mg tissue.

#### 214 **Histology**

215 For histological examination, the lungs were fixed overnight in 4% formaldehyde and embedded in  
216 paraffin. Tissue sections (5 µm) were analyzed after staining with hematoxylin and eosin and scored  
217 blindly for lung damage by an expert pathologist. The scored parameters, to which a cumulative score  
218 of 1 to 3 was attributed, were the following: congestion, intra-alveolar hemorrhagic, apoptotic bodies  
219 in bronchus wall, necrotizing bronchiolitis, perivascular edema, bronchopneumonia, perivascular  
220 inflammation, peribronchial inflammation and vasculitis.

#### 221 **Ethics**

222 Housing conditions and experimental procedures were approved by the ethics committee of animal  
223 experimentation of KU Leuven (license P001/2021).

#### 224 **Statistics**

225 GraphPad Prism (GraphPad Software, Inc.) was used to perform statistical analysis. Statistical  
226 significance was determined using the non-parametric Mann Whitney U-test. P-values of <0.05 were  
227 considered significant.

228

229

230 **Acknowledgments**

231 We thank Carolien De Keyzer, Lindsey Bervoets, Thibault Francken, Stijn Hendrickx, Niels Cremers for  
232 excellent technical assistance. We are grateful to Piet Maes for kindly providing the SARS-CoV-2 strain  
233 used in this study. We thank Prof. Jef Arnout and Dr. Annelies Sterckx (KU Leuven Faculty of Medicine,  
234 Biomedical Sciences Group Management) and Animalia and Biosafety Departments of KU Leuven for  
235 facilitating the animal studies. We thank the Histology department of KU Leuven for technical support  
236 for histopathological analyses. We also thank Fran Berlioz-Seux, Rob Jordan and Betsy Russell for  
237 helpful discussion.

238 **Funding**

239 This project has received funding from the Covid-19-Fund KU Leuven/UZ Leuven and the COVID-19 call  
240 of FWO (G0G4820N), the European Union's Horizon 2020 research and innovation program under  
241 grant agreements No 101003627 (SCORE project) and Bill & Melinda Gates Foundation (BGMF) under  
242 grant agreement INV-006366. This work also has been done under the CARE project, which has  
243 received funding from the Innovative Medicines Initiative 2 Joint Undertaking (JU) under grant  
244 agreement No 101005077. The JU receives support from the European Union's Horizon 2020 research  
245 and innovation programme and EFPIA and Bill & Melinda Gates Foundation, Global Health Drug  
246 Discovery Institute, University of Dundee. The content of this publication only reflects the author's  
247 view and the JU is not responsible for any use that may be made of the information it contains.

248 **Author Contributions**

249 R.A., C.S.F., S.J.F.K and J.N. designed the studies; R.A., S.J.F.K and R.B. performed studies. R.A. and B.W.  
250 analyzed data; R.A. made the graphs; B.W., D.J. and J.N. provided advice on the interpretation of data;  
251 R.A. and J.N. wrote the paper; S.D.J provided essential reagents; R.A., C.S.F., S.J.F.K and J.N. supervised  
252 the study; L.V., D.J. and J.N. acquired funding.

253 **Conflict of Interest Statement:** None to declare.

254 **References**

- 255 1. Adam D. 2022. 15 million people have died in the pandemic, WHO says. *Nature*. England  
256 <https://doi.org/10.1038/d41586-022-01245-6>.
- 257 2. Plante JA, Mitchell BM, Plante KS, Debbink K, Weaver SC, Menachery VD. 2021. The variant  
258 gambit: COVID-19's next move. *Cell Host Microbe* 29:508–515.
- 259 3. Karim SSA, Karim QA. 2021. Omicron SARS-CoV-2 variant: a new chapter in the COVID-19  
260 pandemic. *Lancet* 398:2126–2128.
- 261 4. Wan Y, Shang J, Graham R, Baric RS, Li F. 2020. Receptor Recognition by the Novel  
262 Coronavirus from Wuhan: an Analysis Based on Decade-Long Structural Studies of SARS  
263 Coronavirus. *J Virol* 94.
- 264 5. Liu Y, Hu G, Wang Y, Ren W, Zhao X, Ji F, Zhu Y, Feng F, Gong M, Ju X, Zhu Y, Cai X, Lan J, Guo J,  
265 Xie M, Dong L, Zhu Z, Na J, Wu J, Lan X, Xie Y, Wang X, Yuan Z, Zhang R, Ding Q. 2021.  
266 Functional and genetic analysis of viral receptor ACE2 orthologs reveals a broad potential host  
267 range of SARS-CoV-2. *Proc Natl Acad Sci U S A* 118.
- 268 6. Gu H, Chen Q, Yang G, He L, Fan H, Deng YQ, Wang Y, Teng Y, Zhao Z, Cui Y, Li Y, Li XF, Li J,  
269 Zhang NN, Yang X, Chen S, Guo Y, Zhao G, Wang X, Luo DY, Wang H, Yang X, Li Y, Han G, He Y,  
270 Zhou X, Geng S, Sheng X, Jiang S, Sun S, Qin CF, Zhou Y. 2020. Adaptation of SARS-CoV-2 in  
271 BALB/c mice for testing vaccine efficacy. *Science* (80- ) 369.
- 272 7. Dinno KH, Leist SR, Schäfer A, Edwards CE, Martinez DR, Montgomery SA, West A, Yount BL,  
273 Hou YJ, Adams LE, Gully KL, Brown AJ, Huang E, Bryant MD, Choong IC, Glenn JS, Gralinski LE,  
274 Sheahan TP, Baric RS. 2020. A mouse-adapted model of SARS-CoV-2 to test COVID-19  
275 countermeasures. *Nature* 586:560–566.
- 276 8. Hassan AO, Case JB, Winkler ES, Thackray LB, Kafai NM, Bailey AL, McCune BT, Fox JM, Chen  
277 RE, Alsoussi WB, Turner JS, Schmitz AJ, Lei T, Shrihari S, Keeler SP, Fremont DH, Greco S,

- 278 McCray PB, Perlman S, Holtzman MJ, Ellebedy AH, Diamond MS. 2020. A SARS-CoV-2 Infection  
279 Model in Mice Demonstrates Protection by Neutralizing Antibodies. *Cell* 182:744–753.e4.
- 280 9. Bao L, Deng W, Huang B, Gao H, Liu J, Ren L, Wei Q, Yu P, Xu Y, Qi F, Qu Y, Li F, Lv Q, Wang W,  
281 Xue J, Gong S, Liu M, Wang G, Wang S, Song Z, Zhao L, Liu P, Zhao L, Ye F, Wang H, Zhou W,  
282 Zhu N, Zhen W, Yu H, Zhang X, Guo L, Chen L, Wang C, Wang Y, Wang X, Xiao Y, Sun Q, Liu H,  
283 Zhu F, Ma C, Yan L, Yang M, Han J, Xu W, Tan W, Peng X, Jin Q, Wu G, Qin C. 2020. The  
284 pathogenicity of SARS-CoV-2 in hACE2 transgenic mice. *Nature* 583:830–833.
- 285 10. Liu FL, Wu K, Sun J, Duan Z, Quan X, Kuang J, Chu S, Pang W, Gao H, Xu L, Li YC, Zhang HL,  
286 Wang XH, Luo RH, Feng XL, Schöler HR, Chen X, Pei D, Wu G, Zheng YT, Chen J. 2021. Rapid  
287 generation of ACE2 humanized inbred mouse model for COVID-19 with tetraploid  
288 complementation. *Natl Sci Rev* 8.
- 289 11. Shuai H, Chan JFW, Yuen TTT, Yoon C, Hu JC, Wen L, Hu B, Yang D, Wang Y, Hou Y, Huang X,  
290 Chai Y, Chan CCS, Poon VKM, Lu L, Zhang RQ, Chan WM, Ip JD, Chu AWH, Hu YF, Cai JP, Chan  
291 KH, Zhou J, Sridhar S, Zhang BZ, Yuan S, Zhang AJ, Huang JD, To KKW, Yuen KY, Chu H. 2021.  
292 Emerging SARS-CoV-2 variants expand species tropism to murines. *EBioMedicine* 73.
- 293 12. Stolp B, Stern M, Ambiel I, Hofmann K, Morath K, Gallucci L, Cortese M, Bartenschlager R,  
294 Ruggieri A, Graw F, Rudelius M, Keppler OT, Fackler OT. 2022. SARS-CoV-2 variants of concern  
295 display enhanced intrinsic pathogenic properties and expanded organ tropism in mouse  
296 models. *Cell Rep* 38:110387.
- 297 13. Sun S, Gu H, Cao L, Chen Q, Ye Q, Yang G, Li RT, Fan H, Deng YQ, Song X, Qi Y, Li M, Lan J, Feng  
298 R, Guo Y, Zhu N, Qin S, Wang L, Zhang YF, Zhou C, Zhao L, Chen Y, Shen M, Cui Y, Yang X, Wang  
299 X, Tan W, Wang H, Wang X, Qin CF. 2021. Characterization and structural basis of a lethal  
300 mouse-adapted SARS-CoV-2. *Nat Commun* 12.
- 301 14. Halfmann PJ, Iida S, Iwatsuki-Horimoto K, Maemura T, Kiso M, Scheaffer SM, Darling TL, Joshi

- 302 A, Loeber S, Singh G, Foster SL, Ying B, Case JB, Chong Z, Whitener B, Moliva J, Floyd K, Ujie M,  
303 Nakajima N, Ito M, Wright R, Uraki R, Warang P, Gagne M, Li R, Sakai-Tagawa Y, Liu Y, Larson  
304 D, Osorio JE, Hernandez-Ortiz JP, Henry AR, Ciouderis K, Florek KR, Patel M, Odle A, Wong L-  
305 YR, Bateman AC, Wang Z, Edara V-V, Chong Z, Franks J, Jeevan T, Fabrizio T, DeBeauchamp J,  
306 Kercher L, Seiler P, Gonzalez-Reiche AS, Sordillo EM, Chang LA, van Bakel H, Simon V,  
307 Albuquerque B, Alshammary H, Amoako AA, Aslam S, Banu R, Cognigni C, Espinoza-Moraga  
308 M, Farrugia K, van de Guchte A, Khalil Z, Laporte M, Mena I, Paniz-Mondolfi AE, Polanco J,  
309 Rooker A, Sominsky LA, Douek DC, Sullivan NJ, Thackray LB, Ueki H, Yamayoshi S, Imai M,  
310 Perlman S, Webby RJ, Seder RA, Suthar MS, García-Sastre A, Schotsaert M, Suzuki T, Boon  
311 ACM, Diamond MS, Kawaoka Y, group CMSPS (PSP) study. 2022. SARS-CoV-2 Omicron virus  
312 causes attenuated disease in mice and hamsters. Nature [https://doi.org/10.1038/s41586-022-](https://doi.org/10.1038/s41586-022-04441-6)  
313 04441-6.
- 314 15. Chen Q, Huang X-Y, Liu Y, Sun M-X, Ji B, Zhou C, Chi H, Zhang R-R, Luo D, Tian Y, Li X-F, Hui Z,  
315 Qin C-F. 2022. Comparative characterization of SARS-CoV-2 variants of concern and mouse-  
316 adapted strains in mice. *J Med Virol* <https://doi.org/10.1002/jmv.27735>.
- 317 16. O'Toole Á, Hill V, Pybus OG, Watts A, Bogoch II, Khan K, Messina JP, Tegally H, Lessells RR,  
318 Giandhari J, Pillay S, Tumedi KA, Nyepetsi G, Kebabonye M, Matsheka M, Mine M, Tokajian S,  
319 Hassan H, Salloum T, Merhi G, Koweyes J, Geoghegan JL, de Ligt J, Ren X, Storey M, Freed NE,  
320 Pattabiraman C, Prasad P, Desai AS, Vasanthapuram R, Schulz TF, Steinbrück L, Stadler T, Parisi  
321 A, Bianco A, García de Viedma D, Buenestado-Serrano S, Borges V, Isidro J, Duarte S, Gomes  
322 JP, Zuckerman NS, Mandelboim M, Mor O, Seemann T, Arnott A, Draper J, Gall M, Rawlinson  
323 W, Deveson I, Schlebusch S, McMahon J, Leong L, Lim CK, Chironna M, Loconsole D, Bal A,  
324 Josset L, Holmes E, St George K, Lasek-Nesselquist E, Sikkema RS, Oude Munnink B, Koopmans  
325 M, Brytting M, Sudha Rani V, Pavani S, Smura T, Heim A, Kurkela S, Umair M, Salman M,  
326 Bartolini B, Rueca M, Drosten C, Wolff T, Silander O, Eggink D, Reusken C, Vennema H, Park A,

- 327 Carrington C, Sahadeo N, Carr M, Gonzalez G, de Oliveira T, Faria N, Rambaut A, Kraemer  
328 MUG. 2021. Tracking the international spread of SARS-CoV-2 lineages B.1.1.7 and  
329 B.1.351/501Y-V2 with grinch. Wellcome open Res 6:121.
- 330 17. Owen DR, Allerton CMN, Anderson AS, Aschenbrenner L, Avery M, Berritt S, Boras B, Cardin  
331 RD, Carlo A, Coffman KJ, Dantonio A, Di L, Eng H, Ferre R, Gajiwala KS, Gibson SA, Greasley SE,  
332 Hurst BL, Kadar EP, Kalgutkar AS, Lee JC, Lee J, Liu W, Mason SW, Noell S, Novak JJ, Obach RS,  
333 Ogilvie K, Patel NC, Pettersson M, Rai DK, Reese MR, Sammons MF, Sathish JG, Singh RSP,  
334 Steppan CM, Stewart AE, Tuttle JB, Updyke L, Verhoest PR, Wei L, Yang Q, Zhu Y. 2021. An  
335 Oral SARS-CoV-2 Mpro Inhibitor Clinical Candidate for the Treatment of COVID-19. Science  
336 (80- ) eabl4784.
- 337 18. Toots M, Yoon JJ, Cox RM, Hart M, Sticher ZM, Makhsous N, Plesker R, Barrena AH, Reddy PG,  
338 Mitchell DG, Shean RC, Bluemling GR, Kolykhalov AA, Greninger AL, Natchus MG, Painter GR,  
339 Plemper RK. 2019. Characterization of orally efficacious influenza drug with high resistance  
340 barrier in ferrets and human airway epithelia. Sci Transl Med 11.
- 341 19. Abdelnabi R, Foo CS, De Jonghe S, Maes P, Weynand B, Neyts J. 2021. Molnupiravir Inhibits  
342 Replication of the Emerging SARS-CoV-2 Variants of Concern in a Hamster Infection Model. J  
343 Infect Dis 224:749–753.
- 344 20. Abdelnabi R, Foo CS, Jochmans D, Vangeel L, De Jonghe S, Augustijns P, Mols R, Weynand B,  
345 Wattanakul T, Høglund RM, Tarning J, Mowbray CE, Sjö P, Escudié F, Scandale I, Chatelain E,  
346 Neyts J. 2022. The oral protease inhibitor (PF-07321332) protects Syrian hamsters against  
347 infection with SARS-CoV-2 variants of concern. Nat Commun 13:719.
- 348 21. Neyts J, De Clercq E. 2001. Efficacy of 2-amino-7-(1,3-dihydroxy-2-propoxymethyl)purine for  
349 treatment of vaccinia virus (orthopoxvirus) infections in mice. Antimicrob Agents Chemother  
350 45:84–87.



- 351 22. Charlier N, Leyssen P, Paeshuyse J, Drosten C, Schmitz H, Van Lommel A, De Clercq E, Neyts J.  
352 2002. Infection of SCID mice with Montana Myotis leukoencephalitis virus as a model for  
353 flavivirus encephalitis. *J Gen Virol* <https://doi.org/10.1099/0022-1317-83-8-1887>.
- 354 23. Lefebvre DJ, De Vleeschauwer AR, Goris N, Kollanur D, Billiet A, Murao L, Neyts J, De Clercq K.  
355 2014. Proof of Concept for the Inhibition of Foot-and-Mouth Disease Virus Replication by the  
356 Anti-Viral Drug 2'-C-Methylcytidine in Severe Combined Immunodeficient Mice. *Transbound*  
357 *Emerg Dis* 61:e89–e91.
- 358 24. Abdelnabi R, Boudewijns R, Foo CS, Seldeslachts L, Sanchez-Felipe L, Zhang X, Delang L, Maes  
359 P, Kaptein SJF, Weynand B, Vande Velde G, Neyts J, Dallmeier K. 2021. Comparing infectivity  
360 and virulence of emerging SARS-CoV-2 variants in Syrian hamsters. *EBioMedicine* 68:103403.
- 361 25. Boudewijns R, Thibaut HJ, Kaptein SJF, Li R, Vergote V, Seldeslachts L, Van Weyenbergh J, De  
362 Keyzer C, Bervoets L, Sharma S, Liesenborghs L, Ma J, Jansen S, Van Looveren D, Vercruyse T,  
363 Wang X, Jochmans D, Martens E, Roose K, De Vlieger D, Schepens B, Van Buyten T, Jacobs S,  
364 Liu Y, Martí-Carreras J, Vanmechelen B, Wawina-Bokalanga T, Delang L, Rocha-Pereira J,  
365 Coelmont L, Chiu W, Leyssen P, Heylen E, Schols D, Wang L, Close L, Matthijssens J, Van  
366 Ranst M, Compennolle V, Schramm G, Van Laere K, Saelens X, Callewaert N, Opdenakker G,  
367 Maes P, Weynand B, Cawthorne C, Vande Velde G, Wang Z, Neyts J, Dallmeier K. 2020. STAT2  
368 signaling restricts viral dissemination but drives severe pneumonia in SARS-CoV-2 infected  
369 hamsters. *Nat Commun* 11.
- 370 26. Reed LJ, Muench H. 1938. A simple method of estimating fifty per cent endpoints. *Am J*  
371 *Epidemiol* 27:493–497.

372

Figures

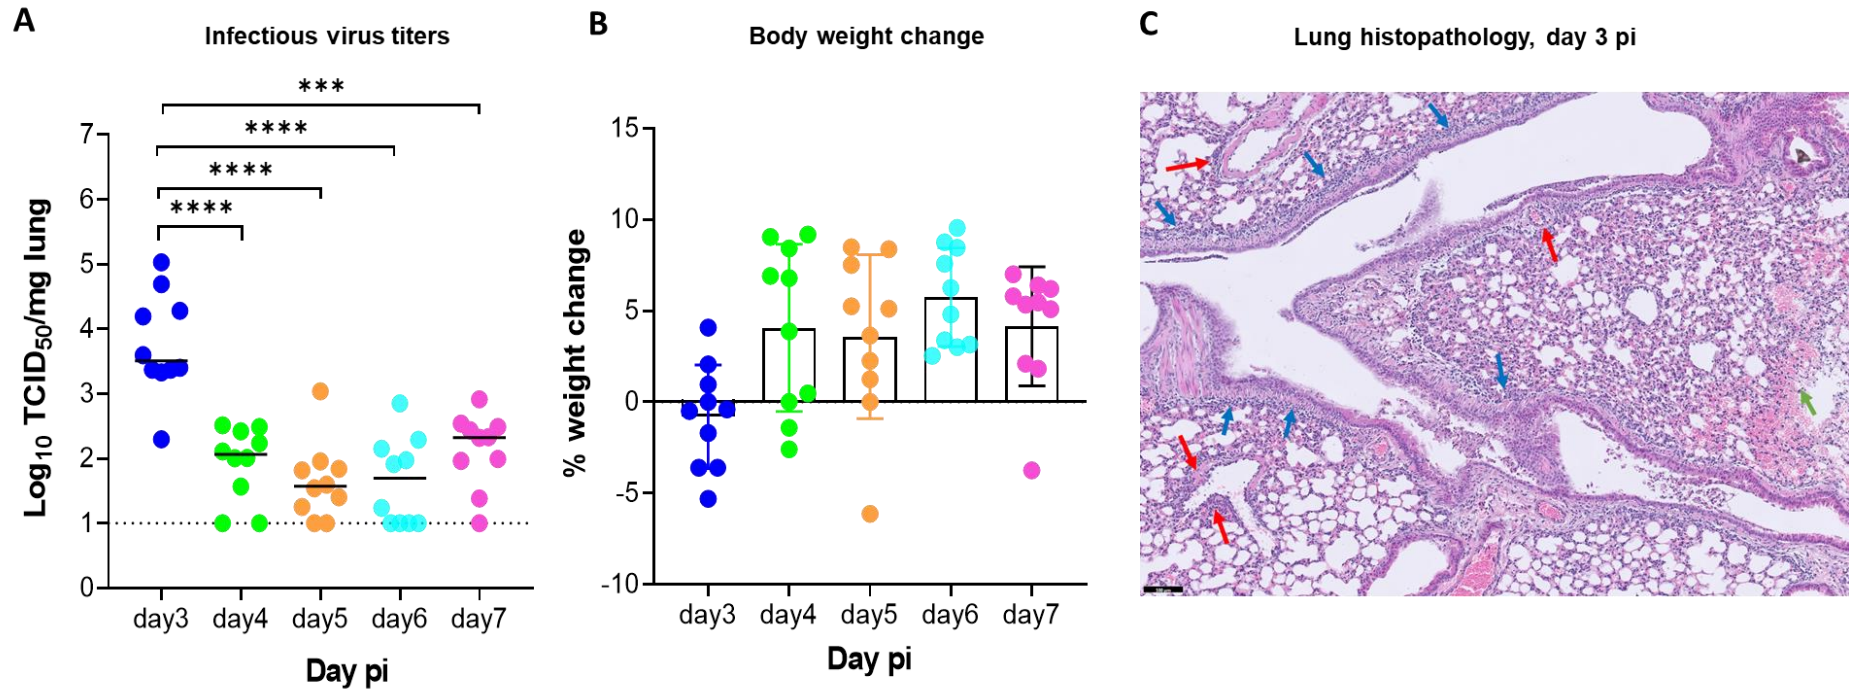

**Fig. 1. Replication kinetics of beta (B.1.351) SARS-CoV-2 in male SCID mice.** (A) Infectious viral loads in the lungs of male SCID mice infected with  $10^5$  TCID<sub>50</sub> of beta SARS-CoV-2 variants at different days post-infection (pi) are expressed as log<sub>10</sub> TCID<sub>50</sub> per mg lung tissue. Individual data and median values are presented. Data were analyzed with the Mann-Whitney U test. \*\*\*P = 0.0003, \*\*\*\*P < 0.0001 (B) Weight change at different days pi in percentage, normalized to the body weight at the time of infection. Bars represent means ± SD. All data are from 2 independent experiments with 10 animals per group. (C) Representative H&E image of lung from SCID mouse infected with the beta variant at day 3 pi showing limited peri-bronchial inflammation (blue arrows), significant peri-vascular inflammation (red arrows) and intra-alveolar hemorrhage (green arrow). Scale Bar=100 μM

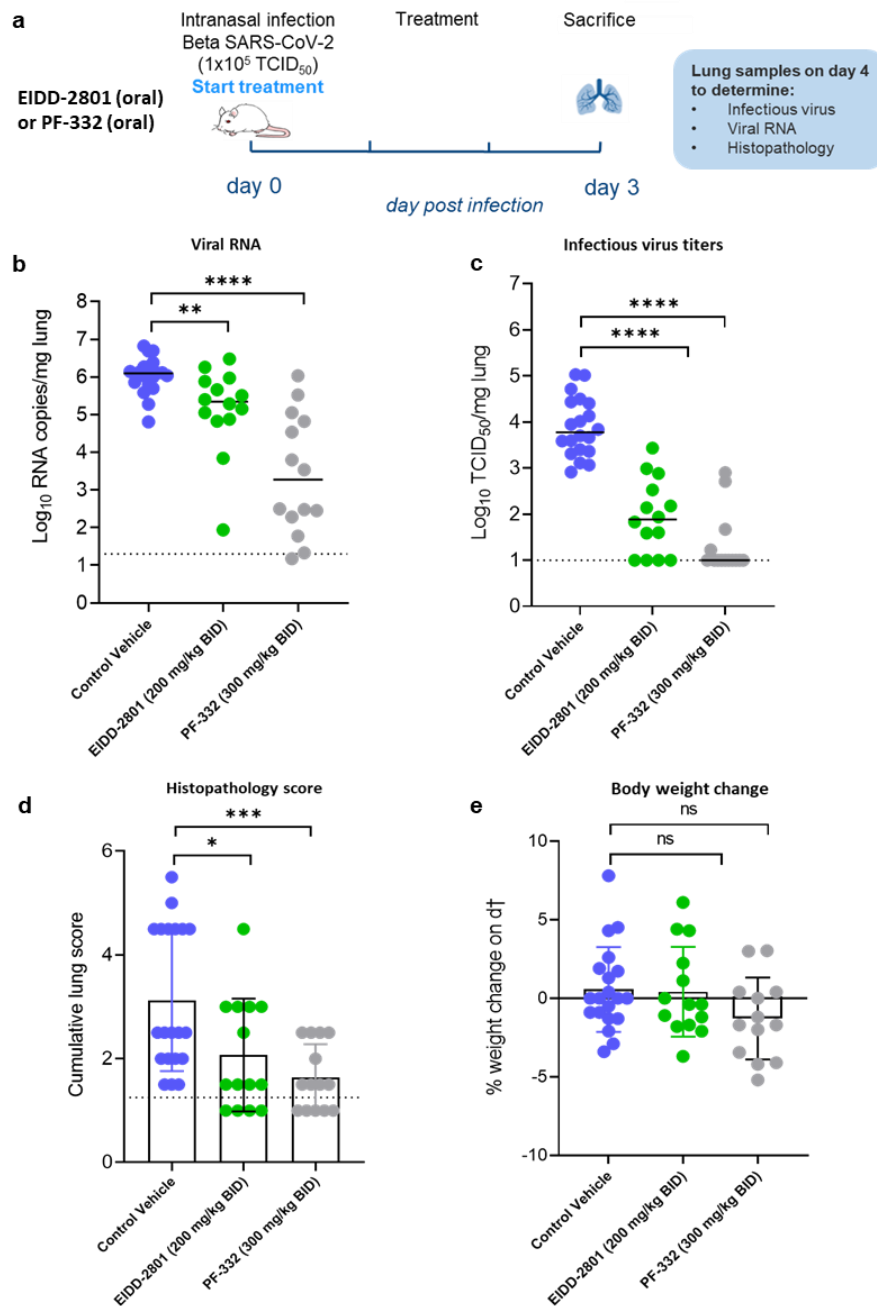

**Fig. 2. Molnupiravir (EIDD-2801) and Nirmatrelvir (PF-332) reduced viral loads in the lungs of beta (B.1.351) SARS-CoV-2-infected SCID mice.** (A) Set-up of the study. (B) Viral RNA levels in the lungs of control (vehicle-treated), EIDD-2801-treated (200 mg/kg, BID) and PF-332-treated (300 mg/kg, BID) SARS-CoV-2 (B.1.351)-infected SCID mice at day 3 post-infection (pi) are expressed as log<sub>10</sub> SARS-CoV-2 RNA copies per mg lung tissue. Individual data and median values are presented. (C) Infectious viral loads in the lungs of control (vehicle-treated), EIDD-2801-treated and PF-332-treated beta SARS-CoV-2-infected SCID mice at day 3 pi are expressed as log<sub>10</sub> TCID<sub>50</sub> per mg lung tissue. Individual data and median values are presented. (D) Cumulative severity score from H&E stained slides of lungs from control (vehicle-treated), EIDD-2801-treated (200 mg/kg, BID) and PF-332-treated (300 mg/kg, BID) SARS-CoV-2-infected SCID mice at day 3 pi. Individual data are presented and bars represent means  $\pm$  SD. The dotted line represents the median score of untreated non-infected hamsters. (E) Weight change at day 3 pi in percentage, normalized to the body weight at the time of infection. Bars represent means  $\pm$  SD. Data were analyzed with the Mann-Whitney U test. \*P < 0.05, \*\*P < 0.01, \*\*\*P < 0.001, \*\*\*\*P < 0.0001, ns=non-significant. All data (panels B, C, D) are from two independent experiments with 14 animals per group except for vehicle group (n=20).

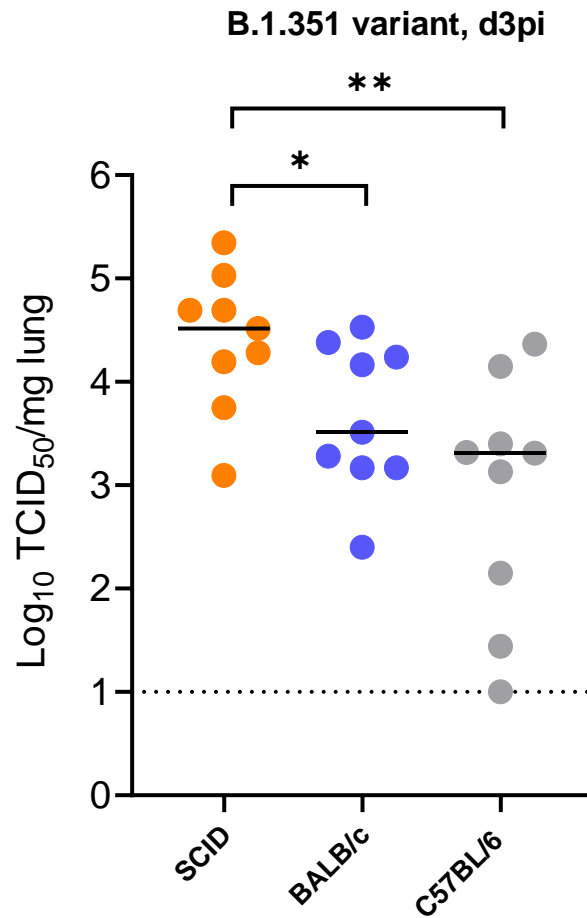

**Supplementary Fig. S1. Replication of beta (B.1.351) SARS-CoV-2 in different mice.** Infectious viral titers in the lungs of male SCID, male BALB/c and male C57BL/6 mice infected with  $10^5$  TCID<sub>50</sub> of beta SARS-CoV-2 variants at 3 days post-infection (pi) are expressed as log<sub>10</sub> TCID<sub>50</sub> per mg lung tissue. Individual data and median values are presented. Data were analyzed with the Mann-Whitney U test. \*P < 0.05, \*\*P<0.01). Data are from two independent experiment with n=9 per group.
